# Supplementary material
Source: HighWire-hosted journal article supplement (https://gut.bmj.com/content/67/6/1064)
Supplement: inline-supplementary-material-1 [file inline-supplementary-material-1.pdf]

## SUPPLEMENTARY APPENDIX

### Human milk oligosaccharide composition predicts risk of necrotizing enterocolitis in preterm infants

Chloe A Autran, MSc<sup>1\*</sup>, Benjamin P Kellman, MSc<sup>1,2\*</sup>, Jae H Kim, MD<sup>1</sup>, Elizabeth Asztalos, MD<sup>3</sup>,  
Arlin B Blood, MD<sup>4</sup>, Erin C Hamilton Spence, MD<sup>5</sup>, Aloka L Patel, MD<sup>6</sup>, Jiayi Hou, PhD<sup>7</sup>,  
Nathan E Lewis, PhD<sup>1,2,8</sup>, Lars Bode, PhD<sup>1</sup>

<sup>1</sup>Department of Pediatrics, University of California San Diego School of Medicine, San Diego, CA, USA

<sup>2</sup>Bioinformatics and Systems Biology Program, University of California, San Diego, CA, USA

<sup>3</sup> Department of Newborn & Developmental Pediatrics, Sunnybrook Health Sciences Centre, Toronto, ON, Canada

<sup>4</sup>Department of Pediatrics, Loma Linda University School of Medicine, Loma Linda CA, USA

<sup>5</sup>Cook Children's Health Care System, Forth Worth, TX, USA

<sup>6</sup>Rush University Medical Center, Chicago, IL, USA

<sup>7</sup>Clinical & Translational Research Institute, University of California San Diego, San Diego, CA, USA

<sup>8</sup>Novo Nordisk Foundation Center for Biosustainability at the University of California San Diego School of Medicine, San Diego, CA, USA

\*Authors contributed equally

Corresponding Author: Lars Bode, PhD

Department of Pediatrics

University of California San Diego School of Medicine

9500 Gilman Dr., Mail code 0715

San Diego, CA 92093

USA

[lbode@ucsd.edu](mailto:lbode@ucsd.edu)

phone: 858 246 1874

# Table of Contents

## 1. Supplementary Figures

|                                                                                                                          |   |
|--------------------------------------------------------------------------------------------------------------------------|---|
| 1.1. Figure S1. Example of case-control matching and milk sample availability .....                                      | 3 |
| 1.2. Figure S2. HMO comparisons for all NEC cases and all controls combined .....                                        | 4 |
| 1.3. Figure S3. Identification of high NEC risk milk samples based on HMO analysis .....                                 | 5 |
| 1.4. Figure S4. Analysis of HMO concentration for multiple days enhances the<br>identification of high risk infants..... | 6 |
| 1.5. Figure S5. Early Estimate of Milk Classification Performance.....                                                   | 7 |

## 2. Supplementary Tables

|                                                                                     |   |
|-------------------------------------------------------------------------------------|---|
| 2.1. Table S1. Multivariate models considered in the analysis .....                 | 8 |
| 2.2. Table S2. Overview of multivariate model selection by backward selection ..... | 9 |

## 3. Supplementary Methods

|                                                                                |       |
|--------------------------------------------------------------------------------|-------|
| 3.1. Case Descriptions .....                                                   | 10-12 |
| 3.2. Statistical Analysis.....                                                 | 13    |
| 3.2.1. Multivariate model selection by backward elimination                    |       |
| 3.2.2. Odds ratio calculation from logistic regression models                  |       |
| 3.2.3. Constructing the decision tree                                          |       |
| 3.2.4. Consecutive day measurements: Cumulative odds of NEC over multiple days |       |
| 3.2.5. Odds-Based Classification: Resampling conscious performance assessment  |       |

## 4. Supplementary Results .....

14-15

|                                                                                                          |  |
|----------------------------------------------------------------------------------------------------------|--|
| 4.1. Multivariate Model Selection by Backward Elimination                                                |  |
| 4.2. Odds-Based Classification: Classification AUC and MCC approach 1 when aggregating multiple samples. |  |

## 5. Supplementary Reference .....

16

# 1. Supplementary Figures

| ID#         | GA          | BW           | D        | RE       | 1 | 2 | 3 | 4  | 5 | 6  | 7 | 8  | 9 | 10 | 11 | 12 | 13 | 14 | 15 | 16 | 17 | 18 | 19 | 20 | 21 | 22 | 23 | 24 | 25              | 26 | 27 | 28 |
|-------------|-------------|--------------|----------|----------|---|---|---|----|---|----|---|----|---|----|----|----|----|----|----|----|----|----|----|----|----|----|----|----|-----------------|----|----|----|
| <b>A003</b> | <b>29_2</b> | <b>1,350</b> | <b>C</b> | <b>A</b> | N | N | N |    |   |    |   | 01 |   | 02 |    | 03 |    | 04 |    | N  | N  | N  | N  | N  | N  | N  | 05 |    | 06              |    | 07 | 08 |
| A002        | 29_0        | 1,114        | C        | A        | N | N | N | N  | N |    |   |    |   |    | N  |    |    |    | 01 |    | 02 |    | 03 |    | 04 |    | 05 |    | 06              |    | 07 |    |
| A005        | 29_3        | 1,420        | C        | A        | N | N |   | 01 |   | 02 |   |    |   |    | 03 | 04 |    | 05 |    | 06 |    | 07 |    | 08 |    |    | 09 |    | 10              |    | 11 |    |
| A018        | 29_1        | 1,276        | C        | A        | N | N | N | N  |   | 01 |   | 02 |   | 03 |    | 04 | N  | 05 |    | 06 |    | 07 |    | 08 |    | 09 |    | 10 |                 | 11 |    | 12 |
| A034        | 28_0        | 944          | C        | W        | N | N | N | N  |   | 01 |   | 02 |   | 03 |    | 04 |    | 05 |    | 06 |    | 07 |    | 08 |    | 09 |    | 10 |                 | 11 |    | 12 |
| A038        | 29_4        | 850          | C        | A        | N | N |   |    | N | N  |   |    |   | 01 |    | 02 |    | 03 |    | 04 |    | 05 |    | 06 |    | 07 |    | 08 | Transferred out |    |    |    |

**Figure S1. Example of case-control matching and milk sample availability.** Case A003 was matched with 5 controls from the same study site A based on gestational age (GA), birth weight (BW), delivery mode (D), then race/ethnicity (RE). Matching was also based on the similarity of collection days. Each number in green boxes shows that a milk sample was available for analysis for that specific day and subject. A003 was diagnosed with NEC on day-of-life 16 (until 22 days post partum; red boxes). N: *non per os* (infant did not receive oral feeds that day).

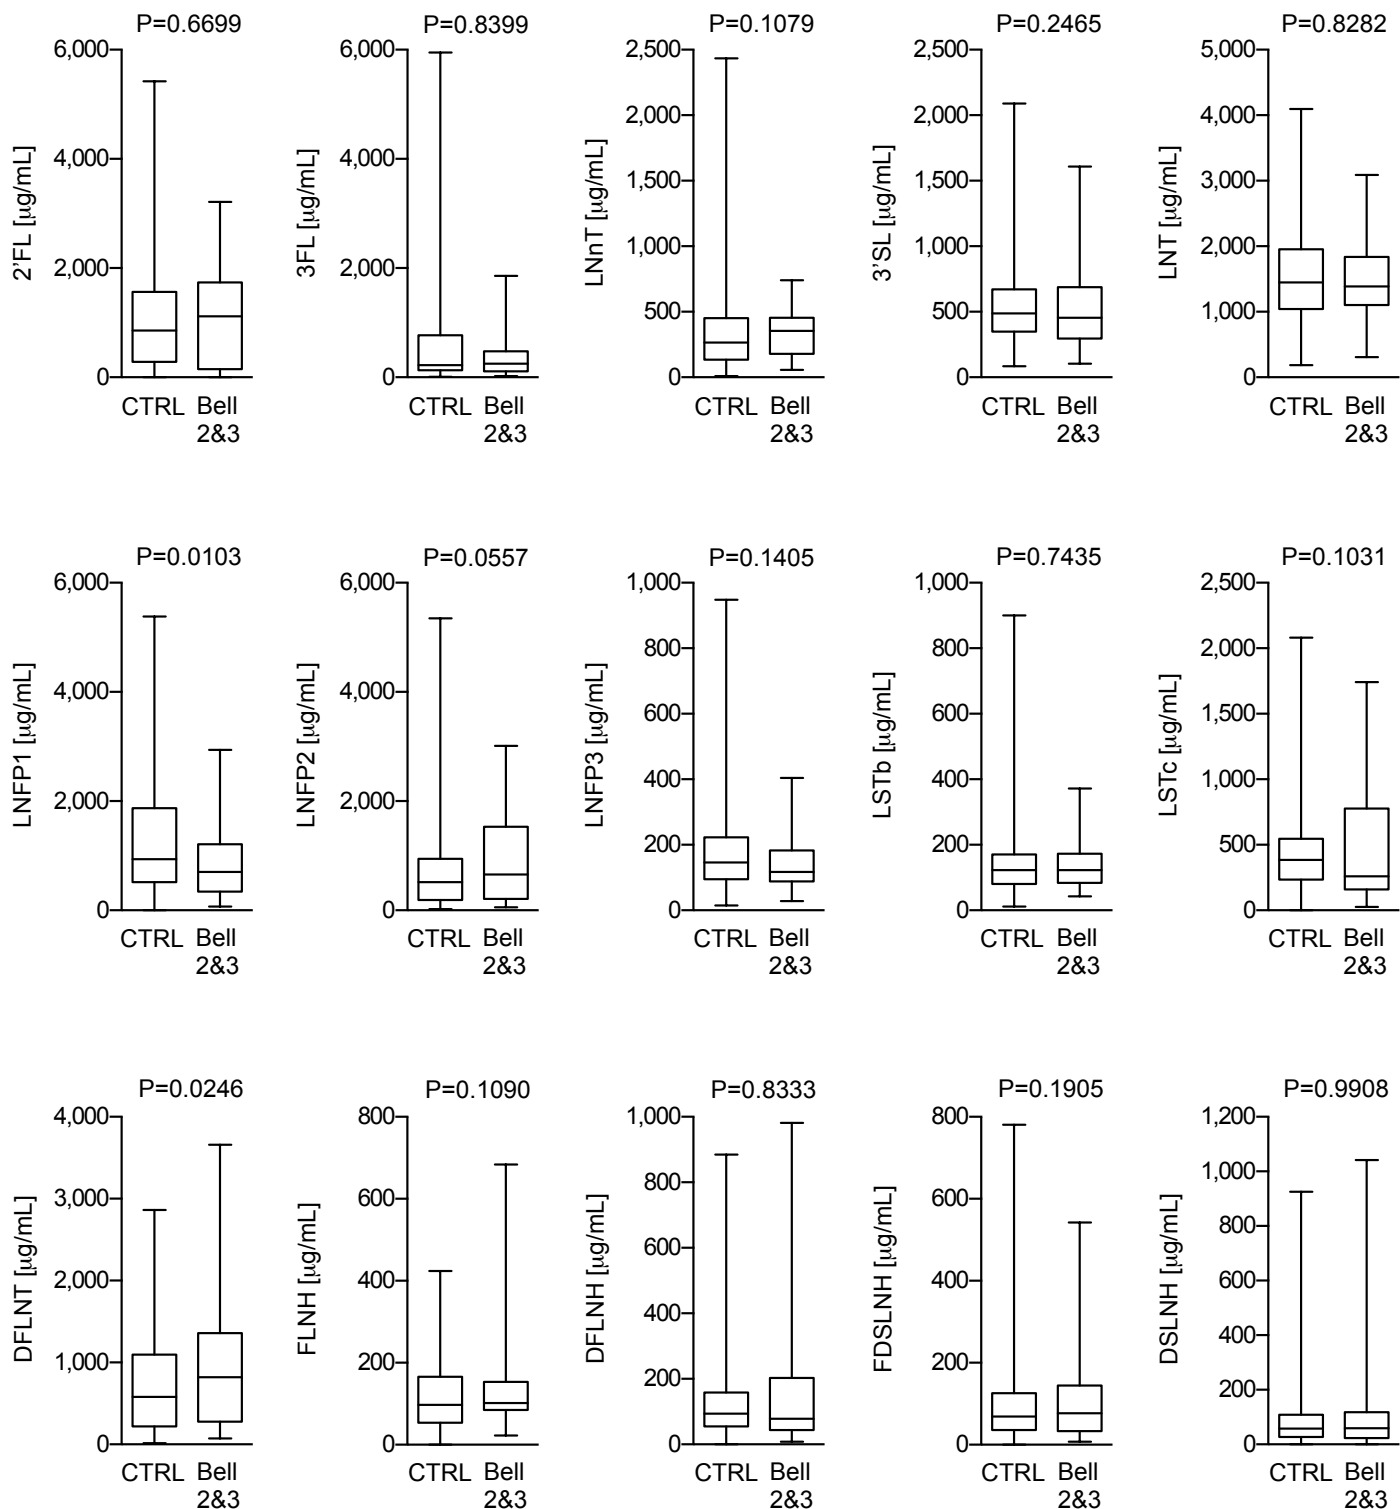

**Figure S2. HMO comparisons for all NEC cases and all controls combined.** Concentrations of all measured HMO were compared between NEC (Bell stages 2 & 3) cases and non-NEC controls. All available samples were included for each subject. Only DSLNT (**Figure 1**), LNFP1, and DFLNT exhibited significant changes in concentration.

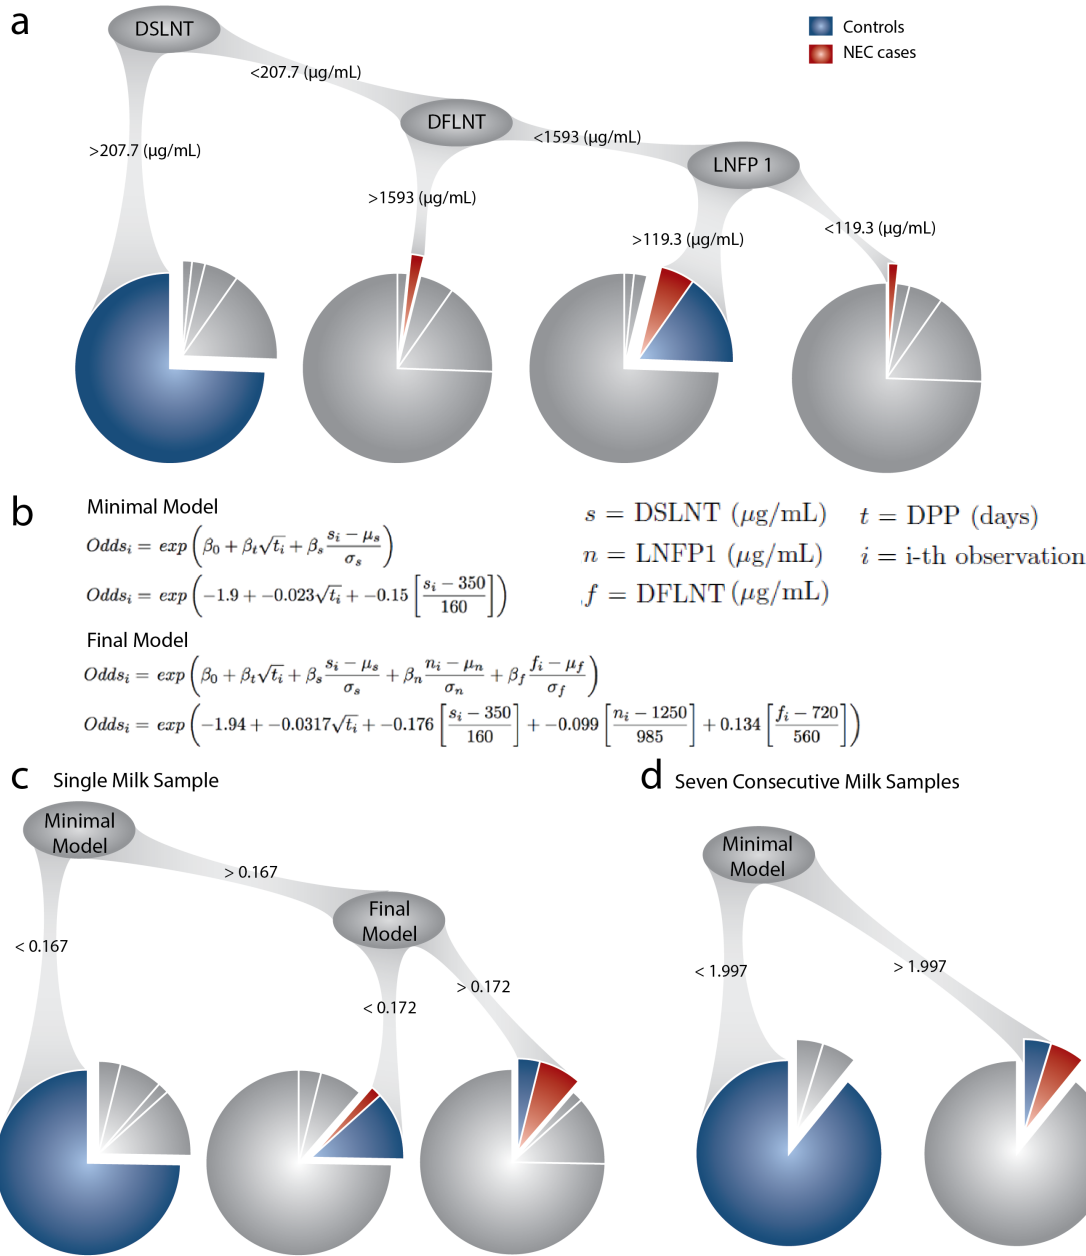

**Figure S3. Identification of high NEC risk milk samples based on HMO analysis.** (A) In this study, we identified three HMO that may aid in identifying milk samples of concern, and these were used to construct a decision tree for sample classification. Samples with greater than 207.7  $\mu\text{g/mL}$  DSLNT are considered low risk by this tree. Samples with lower DSLNT concentrations are higher risk and can be subsequently tested for DFLNT and LNFP1 concentration to further identify high risk samples. The concentrations reported here are estimates based on the size of the study. More quantitatively robust thresholds can be achieved in future studies that address the longitudinal sampling in larger cohorts. (B) Equations for the odds that a given milk sample is associated with an infant that will develop NEC can be calculated based on DSLNT (minimal model) or DSLNT, LNFP1 and DFLNT (Final Model). (C) The final model based odds calculations can be used to partition samples that are associated with infants who will develop NEC. However, LNFP1 and DFLNT provide less information than DSLNT towards classification of milk samples. (D) The identification of milk associated with NEC cases is enhanced by the combined assessment of consecutive milk samples from a given infant, demonstrating that NEC is associated with consistently and continually altered levels of HMOs, specifically DSLNT.

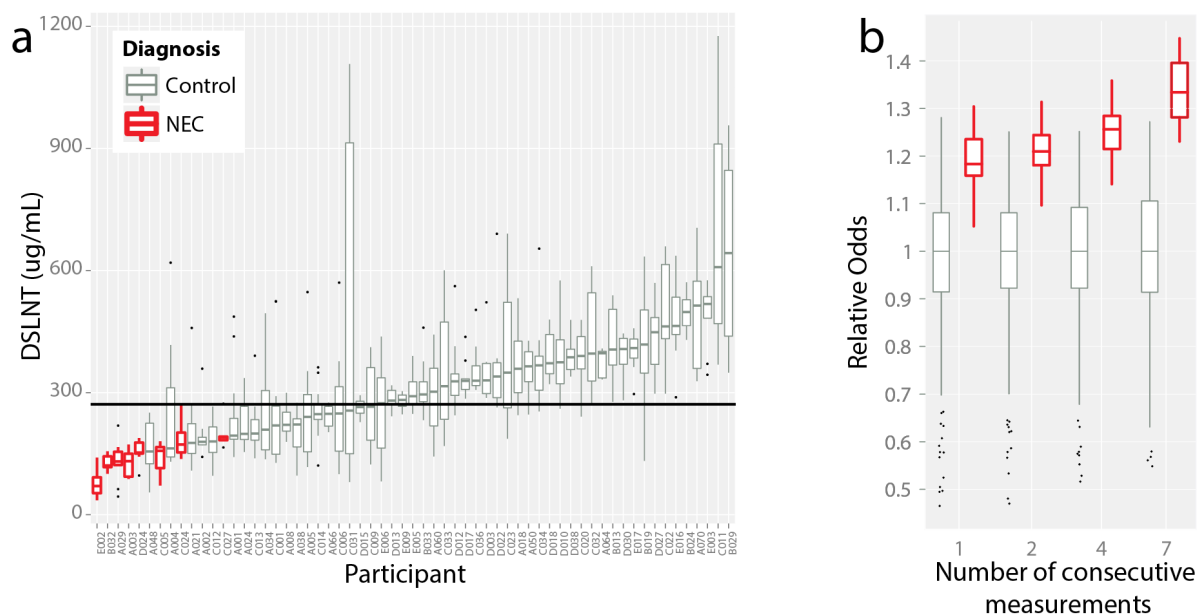

**Figure S4. Analysis of DSLNT concentration for multiple days enhances the identification of high-risk infants. (A)** DSLNT concentration is low in individual milk samples consumed by preterm infants, but many infants are exposed to occasional feedings with low DSLNT without developing NEC. **(B)** The infants who will develop NEC are more readily identifiable when DSLNT concentrations from multiple consecutive milk samples for each subject are cumulatively analyzed. When we combine the computed odds for 2, 4, and 7 consecutive milk samples from the same individual, separation of cases and controls increased. To compute relative odds, the odds for all NEC cases and controls were normalized by dividing their values by the median odd value for non-NEC controls for the corresponding day.

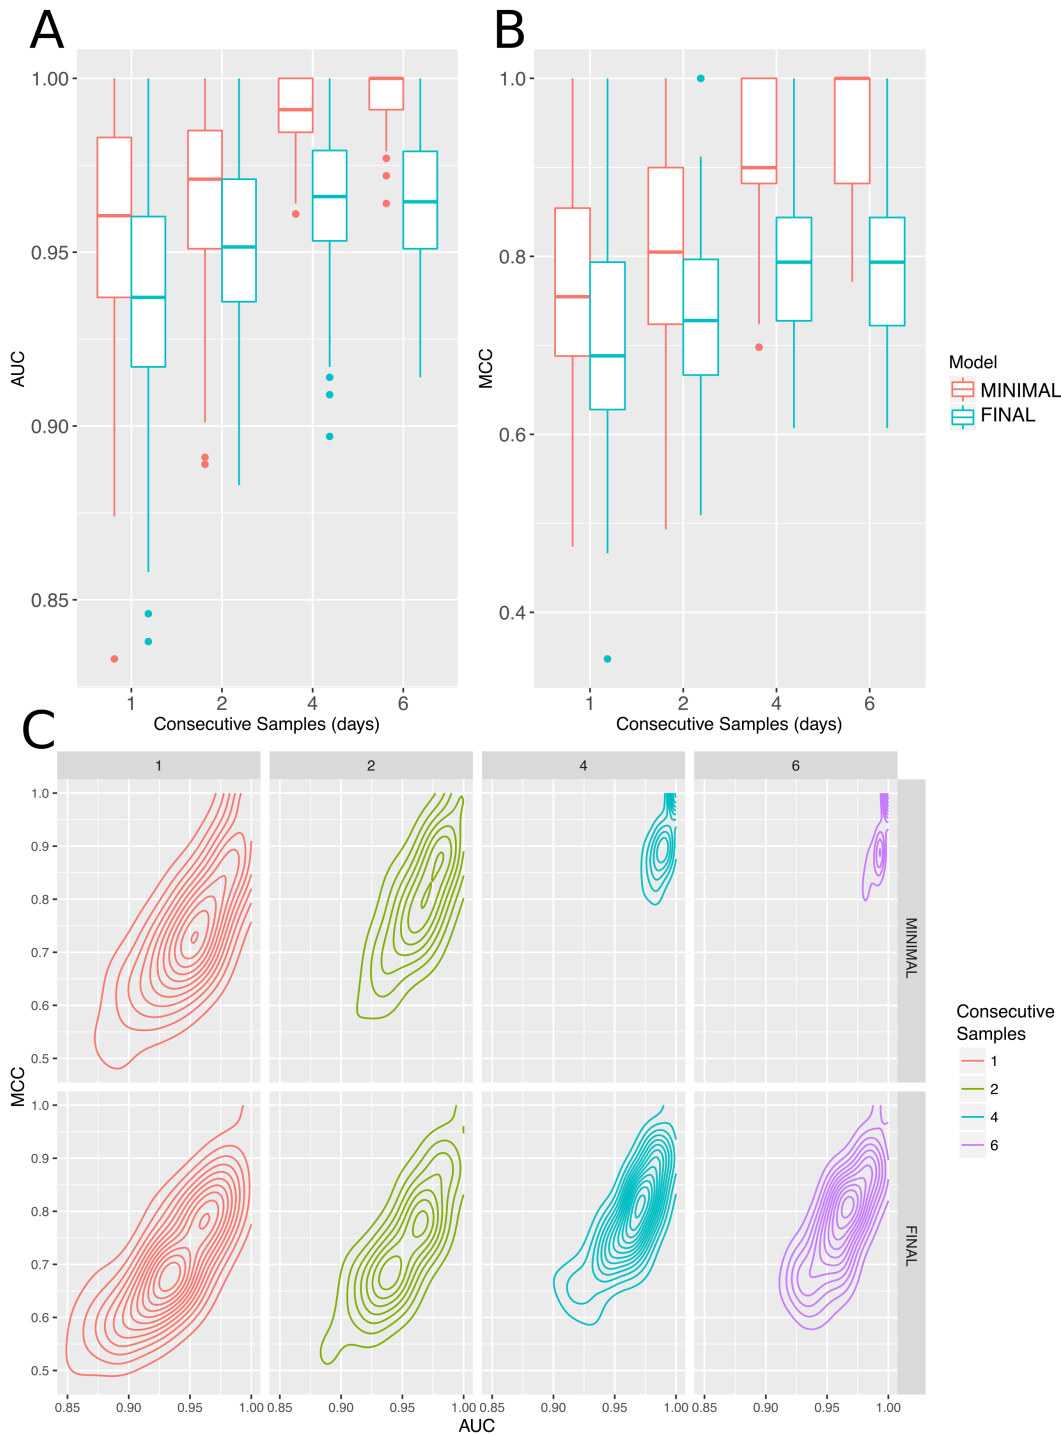

**Figure S5. Early Estimate of Milk Classification Performance.** Resampling-Bias Conscious Estimation of High/Low Risk Milk Classification Performance. **A.** Area under the (ROC) Curve (AUC) was used to evaluate the performance of our milk risk odds estimators. **B.** Mathews Correlation Coefficient (MCC) was also used to assess performance accounting for bias due to the class imbalance (the ratio of case:control subjects is approximately 3:20 while ratio of case:control samples is approximately 1:10). The odds estimating models assessed here are the “full” model (blue) which considers time, DSLNT, LNFP1 and DFLNT as well as the “minimal” model (red) which considers only time and DSLNT. **C.** AUC vs MCC aggregated over different numbers of days (top border and color) and different models (right border). The optimal cutoff in these models was approximately odds=0.16.

## 2. Supplemental Tables

| Minimal Model         |      |                  |         |
|-----------------------|------|------------------|---------|
|                       | OR   | 95% CI           | Pr(W)   |
| (Intercept)           | 0.15 | (0.04 - 0.259)   | P<0.001 |
| $\sqrt{DPP}$          | 0.98 | (0.963 - 0.991)  | 0.0013  |
| standardized(DSLNT)   | 0.86 | (0.828 - 0.893)  | P<0.001 |
| Minimal Model + LNFP1 |      |                  |         |
|                       | OR   | 95% CI           | Pr(W)   |
| (Intercept)           | 0.16 | (0.0414 - 0.272) | P<0.001 |
| $\sqrt{DPP}$          | 0.96 | (0.945 - 0.982)  | P<0.001 |
| standardized(DSLNT)   | 0.86 | (0.831 - 0.894)  | P<0.001 |
| standardized(LNFP1)   | 0.94 | (0.87 - 1)       | 0.063   |
| Minimal Model + DFLNT |      |                  |         |
|                       | OR   | 95% CI           | Pr(W)   |
| (Intercept)           | 0.14 | (0.0362 - 0.237) | P<0.001 |
| $\sqrt{DPP}$          | 0.99 | (0.969 - 1.01)   | 0.17    |
| standardized(DSLNT)   | 0.84 | (0.795 - 0.883)  | P<0.001 |
| standardized(DFLNT)   | 1.12 | (0.986 - 1.26)   | 0.062   |
| Final Model           |      |                  |         |
|                       | OR   | 95% CI           | Pr(W)   |
| (Intercept)           | 0.14 | (0.0374 - 0.25)  | P<0.001 |
| $\sqrt{DPP}$          | 0.97 | (0.946 - 0.992)  | 0.0089  |
| standardized(DSLNT)   | 0.84 | (0.793 - 0.883)  | P<0.001 |
| standardized(LNFP1)   | 0.91 | (0.842 - 0.97)   | 0.006   |
| standardized(DFLNT)   | 1.14 | (1.01 - 1.28)    | 0.022   |
| Complete Model        |      |                  |         |
|                       | OR   | 95% CI           | Pr(W)   |
| (Intercept)           | 0.14 | (0.0381 - 0.252) | P<0.001 |
| $\sqrt{DPP}$          | 0.97 | (0.943 - 0.991)  | 0.0071  |
| standardized(DSLNT)   | 0.84 | (0.794 - 0.885)  | P<0.001 |
| standardized(LNFP1)   | 0.91 | (0.839 - 0.97)   | 0.0063  |
| standardized(DFLNT)   | 1.15 | (1.01 - 1.28)    | 0.024   |
| standardized(LNFP3)   | 0.99 | (0.956 - 1.02)   | 0.55    |

**Table S1. Multivariate models considered in the analysis.** DSLNT, LNFP1 and DFLNT show significant ( $p<0.05$ ) contributions to NEC onset when combined in a final GEE model clustered by subject while considering days postpartum (DPP). The odds ratio (OR) is the exponentiated coefficient and the 95% CI describes the range of possible OR. The p-value was calculated from the Wald statistic of each coefficient.



**A**

| Model                   | qLik    | QIC    | $\Delta_{IC}$ | $\omega$ |
|-------------------------|---------|--------|---------------|----------|
| $t + S + N_1 + F + N_3$ | -187.34 | 186.59 | 0.00          | 0.56     |
| $t + S + N_1 + F$       | -187.48 | 187.49 | 0.90          | 0.36     |
| $t + S + F + N_3$       | -190.53 | 190.56 | 3.97          | 0.08     |
| $t + S + N_1 + N_3$     | -194.70 | 234.95 | 48.36         | 0.00     |
| $t + N_1 + F + N_3$     | -201.48 | 365.69 | 179.10        | 0.00     |

**B**

| Model             | qLik    | QIC    | $\Delta_{IC}$ | $\omega$ |
|-------------------|---------|--------|---------------|----------|
| $t + S + N_1 + F$ | -187.48 | 187.49 | 0.00          | 0.86     |
| $t + S + F$       | -190.59 | 191.07 | 3.58          | 0.14     |
| $t + S + N_1$     | -194.71 | 238.28 | 50.79         | 0.00     |
| $t + N_1 + F$     | -202.28 | 384.02 | 196.53        | 0.00     |

**C**

| Model       | qLik    | QIC    | $\Delta_{IC}$ | $\omega$ |
|-------------|---------|--------|---------------|----------|
| $t + S + F$ | -190.59 | 191.07 | 0.00          | 1.00     |
| $t + S$     | -196.31 | 238.23 | 47.16         | 0.00     |
| $t + F$     | -205.48 | 403.93 | 212.86        | 0.00     |
| $t$         | -208.01 | 419.61 | 228.55        | 0.00     |
| 1           | -208.34 | 427.20 | 236.13        | 0.00     |

**Table S2. Overview of multivariate model selection by backward selection.** Panels A, B and C enumerate the first, second and third iterations of model comparisons considered during the backwards elimination used to construct the final model:  $t+S+N_1+F$ . Panel A details the quasi-Likelihood, Quasi-AIC, Change in Q-AIC ( $\Delta_{IC}$ ) and Cumulative Akaike Weight ( $\omega$ ) when comparing the complete model to three HMO models (excluding time,  $t$ ); the best three HMO model is the final model. Panel B shows these statistics comparing the best three HMO model to candidate two HMO models. Panel C shows these comparisons between the best two HMO model, candidate single HMO models and the null models. HMOs are abbreviated: DSLNT (S), LNFP1 (N1), DFLNT (F), LNFP3 (N3).

### 3. Supplemental Methods

#### 3.1 Case Descriptions

##### **A003 (Bell stage 2)**

This was a male infant born at 29+2 week twin diamniotic monochorionic gestation with a birth weight (BW) of 1,350 g from an *in vitro* fertilization pregnancy born to a 37 year-old Asian mother who received betamethasone. Maternal serology was unremarkable. Delivery was by C-section. Apgars were 5 and 8 at 1 and 5 minutes. Feeds were started on day of life (DOL) 4 with feeds advancing by protocol until on DOL 16, two days after fortifier was added, he had blood in his stool. He was otherwise well but kept *non per os* (NPO) for 8 days for NEC. The white blood count (WBC) was 12,000/mm<sup>3</sup> and C-reactive protein (CRP) was <0.1 mg/dL. He was diagnosed with urinary tract infections growing *Enterococcus faecalis* and was treated with vancomycin and meropenem then switched to gentamicin based on sensitivities. Radiographs had RLQ and L flank pneumatosis that persisted on subsequent radiographs before resolution. Despite the pneumatosis, the abdominal signs were benign. He was diagnosed with Stage 2 NEC and had no NEC sequelae up to discharge.

##### **A029 (Bell stage 2)**

This was a male infant born at 27+3 weeks twin B diamniotic dichorionic gestation with a BW of 1,069 g born to a 30 year-old Caucasian mother. Pregnancy was complicated by preterm labor and premature rupture of membranes (PROM). Delivery was by C-section. Feeds were started on DOL 3 and reached full feeds on DOL 18. On DOL 22 he was made NPO with a presentation of abdominal distension, frank blood in stools and apnea. His WBC was 4,000/mm<sup>3</sup> and CRP 17.7 mg/dL. He was treated with vancomycin and meropenem and then found to have a positive blood culture for *Staphylococcus epidermidis*. He was refeed after 12 days. Radiographs showed pneumatosis that was short-lived. He had Stage 2 NEC. No further sequelae came after feedings resumed.

##### **A066 (Bell stage 1)**

This was a male infant born at 26+6 weeks with a BW of 961 g born to a 31 year-old Hispanic mother. Maternal serologies were unremarkable. Pregnancy was complicated by intrahepatic cholestasis and then PROM but mother was given betamethasone. Delivery was by C-section. Apgars were 3,6, and 7 at 1, 5, and 10 minutes. The infant was intubated at birth and given surfactant. He was extubated on DOL 3. Feeds were advancing up to 50% on DOL 19 before abdominal distension and blood in stools were noted. The WBC was 12,000/mm<sup>3</sup> and CRP was 0.1 mg/dL. Blood cultures were negative. The subject was treated with vancomycin, cefotaxime and metronidazole for 10 days before feeds resumed. Radiographs were never positive for pneumatosis or free air. He had Stage 1 NEC and had no NEC sequelae up to time of discharge and at two-year follow-up.

##### **B032 (Bell stage 3)**

This was a female infant born at 31+0 weeks twin Di-Di gestation with a BW of 1,160 g to a 26 year-old G2P1 African American mother. Pregnancy was complicated by twin gestation, prolonged premature rupture of membranes (PPROM), and breech presentation. Antenatal betamethasone and ampicillin were given. Delivery was by vaginal route. She presented at birth limp and positive pressure ventilation (PPV) was initiated within 1 min of life but heart rate (HR) remained at 60 bpm. Infant was intubated and given 10 seconds of chest compressions before HR rose above 80. Apgars were 1 and 7 for 1 and 5 minutes. She received continuous positive airway pressure (CPAP) and nasal cannula ventilatory support until ten days after birth, and was then placed back on ventilatory support at 15 days of life due to apnea. Serial complete blood counts (CBCs), procalcitonin, and CRP were negative in the first few days of life. Total parental nutrition (TPN) was started at admission and continued for 13 days. Feeds were started DOL 2, liquid human milk fortifier added DOL 10 and then advanced to full feeds by DOL 13. On DOL 15 she developed feeding intolerance with a small emesis and gastric residuals. Radiographs showed pneumatosis in RUQ and LUQ with possible portal venous air. A laparotomy was performed resulting in the resection of half of the bowel with remaining half left with questionable viability. She continued to deteriorate after surgery and died on DOL 17.

**C005 (Bell stage 3)**

This was a male infant born at 26+3 weeks with a BW of 1,040 g to a 34 year-old G6P0 African American woman. Maternal history included polycystic ovarian syndrome (PCOS), insulin dependent gestational diabetes mellitus (GDM), and PPRM. Mother received antibiotics for latency and prenatal steroids. Delivery was by emergent C-section for maternal chorioamnionitis. Infant required positive pressure ventilation and intubation in the delivery room. Apgar scores were 5 and 8 at 1 and 5 minutes. Infant remained intubated and received 3 doses of surfactant. He was treated with indomethacin for a patent ductus arteriosus (PDA) that was functionally closed by DOL 9. He received a total of 6 days of empiric IV antibiotics before the development of NEC. Trophic enteral feedings were started on DOL 3 with maternal breast milk and were gradually advanced to 136 ml/kg/d with breast milk, until DOL 25 when feeds were changed to 20 kcal/oz preterm formula due to low milk supply. On DOL 26, there were recurrent residuals of digested formula. Abdominal radiographs showed dilated loops of bowel, pneumatosis and portal venous gas. Infant's abdomen was distended, firm, erythematous in the RLQ, with hypoactive bowel sounds. Infant was placed on bowel rest and treated with 21 days of IV antibiotic for a positive blood culture for E. coli and CSF pleocytosis. Infant improved his clinical condition with resolution of pneumatosis and bowel dilation within 3 days of starting therapy. He did not tolerate resumption of enteral feedings after 14 days of bowel rest with recurrent bilious residuals and emesis. Persistent feeding intolerance prompted two UGIs with the second one showing a LUQ dilated loop of bowel. He underwent exploratory laparotomy that revealed a large, dense, inflammatory mass in proximal small bowel causing partial small bowel obstruction, with pathologic examination of resected small bowel demonstrating adventitial hemorrhage, serositis, and abscess formation with necrosis. After bowel resection and jejunostomy, he tolerated full enteral feedings with spontaneous bowel movements and was discharged home at 43+2 weeks.

**C024 (Bell stage 2)**

This was a female infant born at 27+1 weeks with a BW of 830 g to a 25 year-old G2P0 African American woman. Maternal history was complicated by severe preeclampsia, HELLP (hemolysis, elevated liver enzymes low platelet) syndrome and Group-B-streptococcus (GBS) positivity. Mother received antenatal steroids, antihypertensive medications, magnesium sulfate and clindamycin. Delivery was by C-section. Infant cried spontaneously and was given CPAP. Apgars were 8 and 9 at 1 and 5 minutes of life. She remained on CPAP until she was intubated for respiratory failure associated with NEC. She was treated for a PDA with indomethacin that closed by DOL 17. She received a total of 5 days of empiric intravenous antibiotics before development of NEC. Trophic enteral feedings were started on DOL 3 with mom's own milk, however, preterm formula was introduced on DOL 14 when mother's milk supply was low. On DOL 24, she received a blood transfusion for symptomatic anemia. Then on DOL 26, she presented with abdominal distension, hypoactive bowel sounds, apnea, lethargy and hypothermia. Abdominal radiographs showed mildly dilated loops of bowel and pneumatosis. She was managed with bowel rest and IV antibiotics for 14 days. Blood culture was negative but the CRP was elevated. She tolerated resumption of enteral feedings of preterm formula and was discharged home at 36+5 weeks.

**C027 (Bell stage 2)**

This was a female infant born at 29+5 weeks with a BW of 1,370 g to a 19 year-old African American G1P0 woman by C-section with prolonged preterm premature rupture of membranes. Mother received prenatal steroids, antibiotics, and magnesium sulfate. Apgars of 6 and 9 at 1 and 5 minutes of life. She transitioned from CPAP to nasal cannula oxygen by DOL 2. Trophic enteral feedings were started on DOL 2 with mother's own milk and preterm formula was introduced on DOL 12 when milk supply was low. She received a total of 4 days of empiric intravenous antibiotics prior to the development of NEC. She tolerated full enteral feeds until DOL 17 when she presented with residuals, emesis, bradycardia, abdominal distension and bloody stools. Abdominal radiographs showed dilated loops of bowel and pneumatosis. Her abdomen was distended with bowel sounds present. She was placed on bowel rest and intravenous antibiotics for 9 days. Blood culture was negative with

an elevated CRP. She tolerated resumption of enteral feedings with preterm formula and was discharged home at 36+5 weeks postmenstrual age (PMA).

**D015 (Bell stage 1)**

This was a male infant born at 26+0 weeks to a 34 year-old G2P1 mother by spontaneous labor and spontaneous vaginal delivery (SVD). Maternal serologies were unremarkable aside from GBS positivity. Pregnancy was complicated by early vaginal bleeding from 16 weeks with concern for chronic abruption. Maternal history included hypothyroidism on thyroid replacement and a history of asthma. PROM occurred at 25+3 weeks. Decreased amniotic fluid was noted at 25 6/7 weeks along with poor biophysical profiles of 4/8 and then 6/8 at 26 weeks. Antenatal steroids were given as well as peripartum antibiotics. Apgars were 5, 6, 8 at 1, 5, 10 minutes. He was intubated at 20 minutes of life, given surfactant and placed on high frequency oscillation ventilation (HFOV). On DOL 6, he developed abdominal distention, feeding intolerance and bowel wall thickening on abdominal x-ray. He was treated medically with bowel rest and antibiotics for 10 days and went home after a prolonged neonatal course at 43+3 weeks.

**D024 (Bell stage 2)**

This was a female infant born at 26+2 weeks to a 32 year-old G2P1 mother. Mother had unremarkable serology. This was a twin pregnancy with a vanishing twin. Maternal history included a two-year history of infertility and PCOS with this pregnancy assisted by intracytoplasmic sperm injection (ICSI) and intraventricular hemorrhage (IVH). PPRM occurred at 25+3 weeks and mother was given penicillin and then erythromycin for GBS positivity. She received betamethasone 4-5 days prior to delivery. Emergency C-section was done for possible cord prolapse with breech presentation but was found to have legs protruding. Apgars were 5, 7, 9 at 1, 5, 10 minutes. The infant was given positive pressure and placed on CPAP and room air. She remained on CPAP until 2 weeks of age. She had a PDA that required two courses of indomethacin to close. She was started on breast milk on day 3 of life and reached full feeds by day 13. Feeding intolerance occurred on day 14 concurrent with fortifier introduction, presence of the PDA and possible coagulase negative Staphylococcus (CONS) sepsis. Small trophic feeds were started after two days followed by advancement but increasing abdominal girth and free air on abdominal x-ray were noted. She was started on antibiotics and transferred to Children's Hospital where she underwent surgical management.

**E002 (Bell stage 3)**

This was a male infant born at 25+0 weeks to a 17 year-old G1P0 mother by vaginal delivery. Maternal history included marijuana use early in the first trimester, but no other drugs of abuse. She did not receive antenatal steroids. He received prophylactic indomethacin for IVH prevention. In his first week of life, he required extensive delivery resuscitation, pressors, and extreme volumes of blood products. On DOL 23 he developed increased abdominal distention and an ileus. Abdominal US revealed contaminated ascites consistent with a perforation. His first laparotomy revealed an intestinal perforation at the site of a Meckel's diverticulum with subsequent ileostomy. At 2 months of age, he developed symptoms of Bell Stage 3 NEC with bloody stool, pneumatosis, and feeding intolerance. This diagnosis was confirmed on laparotomy, along with stricture from early NEC that was not obvious during his first laparotomy. He stayed in the hospital for 148 days. He demonstrated severe functional short bowel syndrome, despite adequate small bowel length. Since his NICU discharge, he has required 3 subsequent hospitalizations and 3 ER visits.

## 3.2 Statistical Analysis and Classification

### 3.2.1 Multivariate Model Selection by Backward Elimination

Multivariate models were built to include factors that marginally contributed to the onset of NEC based on covariate and HMO pre-screening ( $\text{Pr}(W) < 0.2$ ). Backward elimination (BE) was used to select a final multivariate model. BE removes one variable at a time starting from a model containing all variables passing the pre-screening. In each iteration of BE, the variable with the smallest contribution to the likelihood of the model is removed; contribution to likelihood is assessed by removing the variable and comparing the likelihoods of the original and new model. BE terminates when no more variables can be removed from the model without decreasing the likelihood. The performance of notable models examined in the backward elimination is shown in **Table S1**. The iterations of the backward propagation are detailed in **Table S2** and the accompanying text.

### 3.2.2 Odds ratio calculation from logistic regression models

All GEE models and regressions were logistic therefore analysis involved the calculation of odds, odds ratios, confidence intervals and significance. The odds ratio (OR) are the exponentiated coefficients ( $\beta$ ) of each variable,  $\text{OR} = e^\beta$ . Confidence intervals (CI) for the odds ratios were calculated using the delta method, a function of standard error (SE) of the coefficient of each variable,  $\text{CI} = e^\beta \pm 1.96 e^\beta \text{SE}$ . The Wald statistic tests if a coefficient diverges from zero along a normal distribution to describe the probability that the coefficient is non-zero.

### 3.2.3 Constructing the decision tree

Decision trees were constructed using J48, a Java implementation in Weka [Witten & Frank, 2005] of the C4.5 decision tree-generating algorithm. C4.5 selects recursive partitions to the data by optimizing normalized information gain [Quinlan, 1993]. We used RWeka package in R, a wrapper package for the Weka library [Hornik, 2009]. While training our decision trees, the minimum number of observations per leaf node was set to 20 to avoid over-fitting. J48 decision trees were learned from the odds produced by our multivariate models to exemplify their prescriptive information. These decision trees exemplify the prescriptive capabilities of our observations. Given the smaller cohort in this study, the decision trees are provided as qualitative analysis. Future work will be able to evaluate and provide a more quantitative classifier that addresses longitudinal sampling in a larger cohort.

### 3.2.4 Consecutive Day Measurements: Cumulative odds of NEC over multiple days

We also applied the cumulative odds across multiple consecutive samples in decision tree training. Cumulative odds (CO) were calculated as the one minus the joint probability that several consecutive samples ( $s_i$ ) would not be associated with NEC (N). The cumulative odds demonstrated enhanced separation between milk associated with NEC cases vs. controls (**Figure S3D** and **Figure S4B**). The cumulative odds are used to aggregate over multiple consecutive observations and thereby improve classification.

$$CO_{n:m} = 1 - \prod_{i=n}^m \text{Pr}(s_i \notin N)$$

### 3.2.5 Odds-Based Classification: Resampling conscious performance assessment

Bootstrapping was used to estimate of the performance of our models at the task of high/low risk milk classification. Bootstrapping estimates tend to be conservative and provide a lower variance estimate, which was preferred here due to the small number of cases currently available. To avoid subject re-sampling bias we chose at most 1 sample per subject in each performance-assessing iteration. In each of 100 iterations, 2/3 of subjects were randomly selected. From each subject selected, only one sample was used per iteration. Sampling 2/3 of the available subjects excludes multiple subjects while still maintaining a representative sample ( $n=40$  samples/iteration). This sampling proportion allowed for good assessment of the performance variance. Limiting each subject to one sample per iteration ensures no subject was over-represented in any of the performance assessments.

**Code Repository:** Code can be found at [https://github.com/bkellman/NEC\\_HMO](https://github.com/bkellman/NEC_HMO)

## 4. Supplemental Results

### 4.1 Multivariate Model Selection by Backward Elimination

Multivariate models were selected using Backwards Elimination (BE) to search combinations of the four HMO (DSLNT, LNFP1, DFLNT, LNFP3), that passed ( $\text{Pr}(W) < 0.2$ ) the univariate screening. We sought to minimize QIC and maximize parsimony. The first BE iteration (**Table S3A**) showed a small increase in QIC from the final model (t+S+N1+F+N3) to a smaller, more parsimonious model (t+S+N1+F). The next BE iteration (**Table S3B**) found a larger increase ( $\Delta_{\text{IC}} > 3.58$ ) in QIC in all candidate bivariate models. The failure to find a more parsimonious model with lower QIC concluded Backward Elimination and suggests that t + S + N1 + F (the final model) is the most parsimonious and descriptive model. We note that  $\Delta_{\text{IC}}(\text{t+S}; \text{t+S+N1+F}) = 50.74$  (**Table S3A and S3C**). This is not a negligible  $\Delta_{\text{IC}}$ , but due to the substantial increase in parsimony offered by the univariate model over the trivariate model we consider t + S (the minimal model) to be a notable model as well.

The formulas below compute the odds that a child will develop NEC based on HMO concentrations in milk consumed on the  $i^{\text{th}}$  day of life. The odds that a child will develop NEC can be computed based on HMO concentration. This is done by using the exponentiation of the coefficients parameterized by the time (t) and the z-statistic standardized levels of DSLNT (s), LNFP1 (n) and DFLNT (f) at observation  $i$ . The first equation describes the Minimal Model including only time and DSLNT and the second equation describes the Final Multivariate Model including time, DSLNT, LNFP1 and DFLNT.

Minimal Model

$$\text{Odds}_i = \exp\left(\beta_0 + \beta_t \sqrt{t_i} + \beta_s \frac{s_i - \mu_s}{\sigma_s}\right)$$

$$\text{Odds}_i = \exp\left(-1.9 + -0.023 \sqrt{t_i} + -0.15 \left[\frac{s_i - 350}{160}\right]\right)$$

|                                      |                               |
|--------------------------------------|-------------------------------|
| $s = \text{DSLNT } (\mu\text{g/mL})$ | $t = \text{DPP (days)}$       |
| $n = \text{LNFP1 } (\mu\text{g/mL})$ | $i = i\text{-th observation}$ |
| $f = \text{DFLNT } (\mu\text{g/mL})$ |                               |

Final Model

$$\text{Odds}_i = \exp\left(\beta_0 + \beta_t \sqrt{t_i} + \beta_s \frac{s_i - \mu_s}{\sigma_s} + \beta_n \frac{n_i - \mu_n}{\sigma_n} + \beta_f \frac{f_i - \mu_f}{\sigma_f}\right)$$

$$\text{Odds}_i = \exp\left(-1.94 + -0.0317 \sqrt{t_i} + -0.176 \left[\frac{s_i - 350}{160}\right] + -0.099 \left[\frac{n_i - 1250}{985}\right] + 0.134 \left[\frac{f_i - 720}{560}\right]\right)$$

### 4.2 Odds-Based Classification: Classification performance is exceptional when aggregating multiple samples and controlling for resampling bias.

The decision trees in **Figure S3** provide a nice visualization of the potential discriminative power of the odds produced by the models above. With both single and multiple day considerations of odds, the apparent classification is excellent. For a rigorous assessment of the discriminative power of the minimal and final GEE model generated odds, we directly examined the performance with the rolling threshold of a Receiver Operating Characteristic (ROC) curve.

By evaluating the classification performance of the GEE generated odds we can focus on mitigating the resampling bias only in the performance evaluation since the learning is already done. As discussed in the supplemental methods, resampling bias was addressed using a bootstrapping approach to include no more than 1 sample per subject for each bootstrap iteration. Performance of the final and minimal model calculated odds were found to be exceptional, as quantified by the median AUC and median MCC.

In all assessments, the minimal model outperformed the final model. Considering that the final model utilizes more information, the underperformance of the final model may be due to over-fitting while the minimal model is more generalizable. The median AUC is typically above .95 for all models. The minimal model AUC is close to 1 considering only 2 consecutive milk samples while the final model converged at approximately AUC=.96 considering 4 consecutive milk samples. As expected, the AUC is inflated, relative to the MCC, by the class imbalanced of the data. The MCC follows a similar pattern to the AUC. The minimal model converges at

MCC=1 considering 6 consecutive milk samples. The minimal model outperforms the final model which converges at MCC=.8 considering 4 consecutive milk samples. As expected AUC and MCC show correlation. Additionally, these metrics converge and improve as more consecutive samples are included. From this examination, the minimal model considering 2 consecutive samples appears to be the most economical model, with AUC=.97 and MCC=.8. The minimal model considering 4 consecutive samples appears to have the highest performance before effective convergence, AUC=.99 and MCC=.9. In most assessments, the optimal cutoff was approximately odds=.16. However, due to the limited size of this study, this cutoff is provided as a proof of principle and is not yet appropriate for broader use. Larger follow up studies will be required to obtain more robust estimates and further mitigate potential contributions from over-fitting. Furthermore, we believe that the minimal model is the most generalizable instrument produced by this investigation. This is supported by the consistent higher median AUC and MCC of the minimal model generated odds over the final model generated odds in this bootstrapping validation. One explanation for the lower performance of the odds generated by the final model is that it is too specific for generalization. This means the final model is more likely to contain information pertinent to these specific instances of NEC while the minimal model is more likely to describe the broader population of NEC cases. More specifically, DFLNT and LNFP1 are more likely to be associated with specific instances of NEC induction while the depletion of DSLNT is a global feature of the disease.

## 5. Supplementary Reference

Witten IH and Frank E. Data Mining: Practical Machine Learning Tools and Techniques. 2nd Edition, Morgan Kaufmann, San Francisco. 2005

Hornik K, Buchta C, Zeileis A. Open-Source Machine Learning: R Meets Weka. Computational Statistics 2009;24(2):225-232.

Quinlan JR. C4.5: Programs for Machine Learning. Morgan Kaufmann Publishers, 1993.
